# Supplementary material for: The construction of intrahepatic cholangiocarcinoma model in zebrafish
Source: PubMed Central journal article supplement (PMC5645375; doi:10.1038/s41598-017-13815-0), 2017-10-17

## Supplementary Information

### The construction of intrahepatic cholangiocarcinoma model in zebrafish

Jing Wang<sup>1</sup>, Xiaoqian Leng<sup>1,2</sup>, Guiping Wang<sup>1</sup>, Xiaoyang Wan<sup>1</sup> and Hong Cao<sup>1,\*</sup>

<sup>1</sup>State Key Laboratory of Freshwater Ecology and Biotechnology, Institute of Hydrobiology, Chinese Academy of Sciences, Wuhan 430072, China

<sup>2</sup>Key Laboratory of Freshwater Biodiversity Conservation, Ministry of Agriculture of China, Yangtze River Fisheries Research Institute, Chinese Academy of Fisheries Science, Wuhan 430223, China

\*Author for correspondence (regancao@ihb.ac.cn)

## Supplementary Figure 1

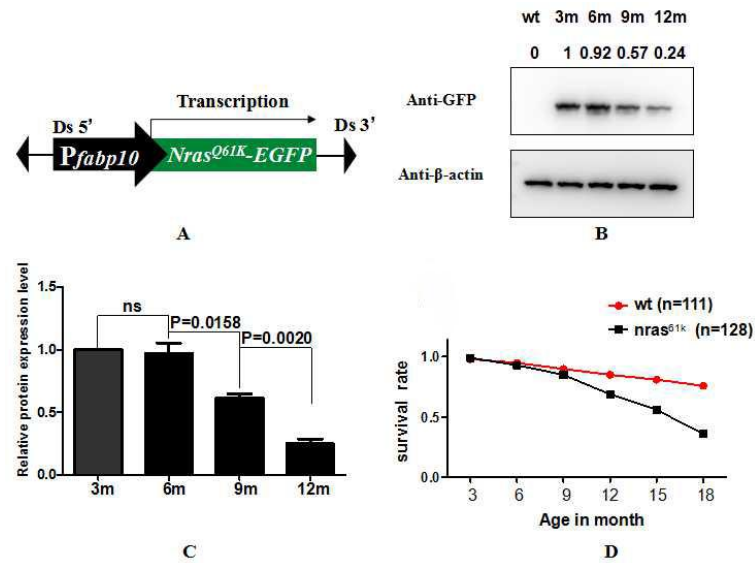

### Fig. 1. Generation of *Tg(fabp10:nras<sup>61K</sup>)* transgenic zebrafish.

(A) Schematic diagram of the *Tg(fabp10:nras<sup>61K</sup>)* transgenic zebrafish. The liver-specific *nras<sup>61K</sup>-EGFP* gene was inserted into the C-terminus of the liver-driver promoter *pfabp10*. (B) Western blots showed that GFP-NRAS<sup>61K</sup> were expressed in the live samples of *Tg(fabp10:nras<sup>61K</sup>)* transgenic zebrafish at 3, 6, 9 and 12 mpf compared with WT (12 mpf). (C) The relative protein expression level of GFP-NRAS<sup>61K</sup> in the live samples of *Tg(fabp10:nras<sup>61K</sup>)* transgenic zebrafish at 3, 6, 9 and 12 mpf. (D) The survival curves of the homozygous *Tg(fabp10:nras<sup>61K</sup>)* transgenic zebrafish (n=128) and WT siblings as control (n=111).

## Supplementary Figure 2

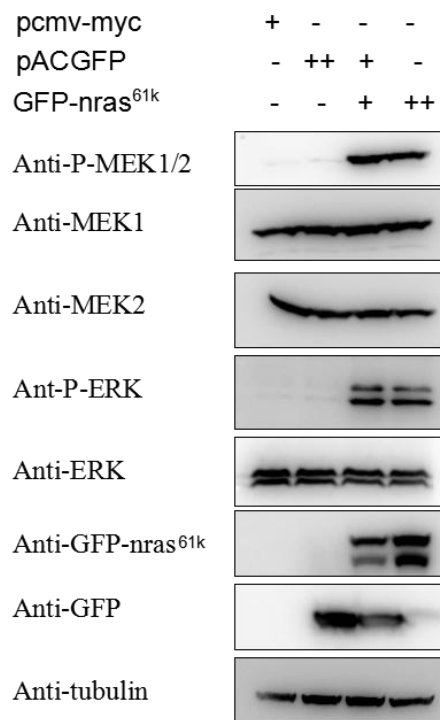

**Fig. 2. pMEK1/2 and pERK were induced by GFP-NRAS<sup>61K</sup> in 293T cells.**

Western blots showed that pMEK1/2 and pERK were induced after transfection of pAc-GFP-*nras*<sup>61K</sup> in 293T cells compared with controls.

### Supplementary Figure 3

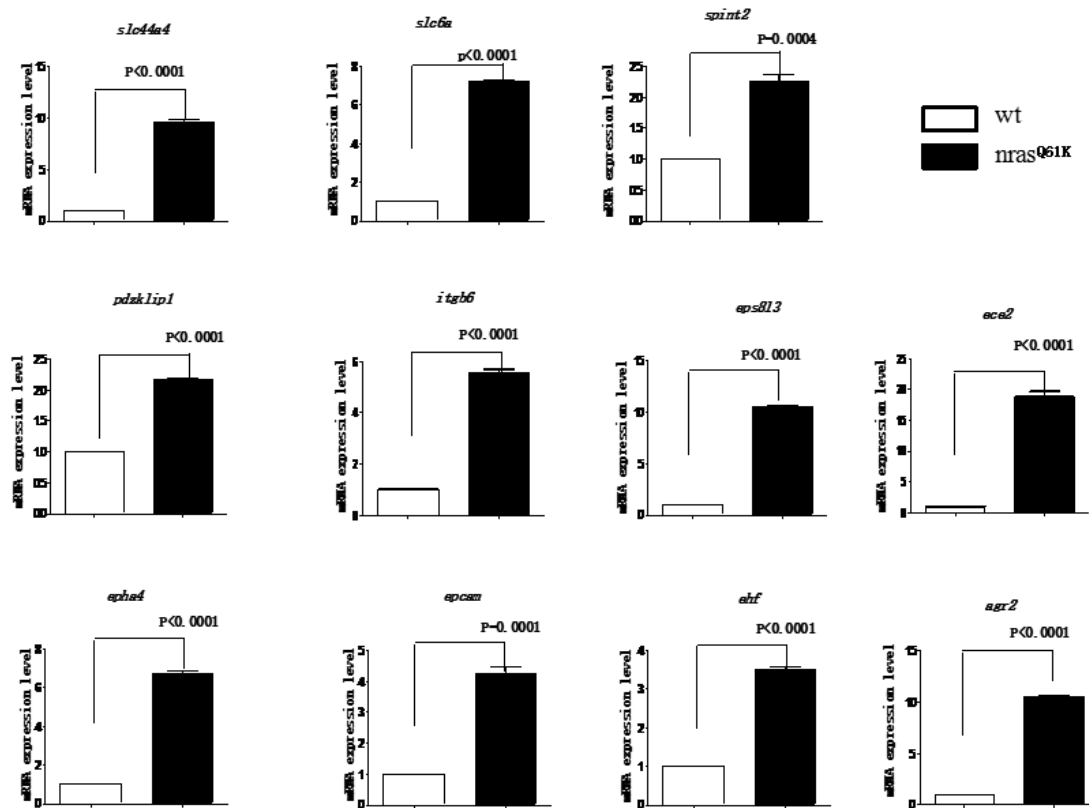

**Fig. 3. Determination of expression levels of 11 ICC markers by qRT-PCR in the liver of WT and *Tg(fabp10:nras<sup>G61K</sup>)* transgenic zebrafish (12 mpf).**

Determination of expression levels of 11 ICC markers ( $\log_2$  fold change  $\geq 1$  and  $P \leq 0.05$ ) by qRT-PCR in the liver of WT and *Tg(fabp10:nras<sup>G61K</sup>)* transgenic zebrafish (12 mpf). The expression levels of these genes in each WT and transgenic liver sample were first measured and normalized with the expression level of  $\beta$ -actin ( $n=4$  each). The  $\log_2$  fold changes in expression in the transgenic samples as compared with matched WT sample are presented.

## Supplementary Figure 4

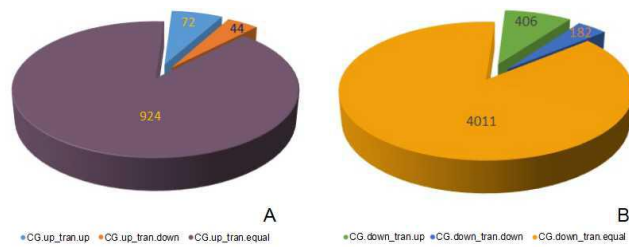

**Fig. 4. Comparative analysis of the methylome and transcriptomic profiles by pie chart**

(A) Comparative analysis showed that when the CG methylation was up-regulated, there were 72 genes up-regulated and 44 genes down-regulated at transcription level, while 924 genes remained stable.

(B) When the CG methylation was down-regulated, the number of up-regulated, down-regulated and unchanged genes at transcription level were 406, 182 and 3559, respectively.

**Supplementary table 3. The CpG islands sequences in three ICC marker genes**

| Gene Symbol               | The CpG islands sequences                                                                                                                                                                                                                                                                                          | chromosome | Integration loci                                                             |
|---------------------------|--------------------------------------------------------------------------------------------------------------------------------------------------------------------------------------------------------------------------------------------------------------------------------------------------------------------|------------|------------------------------------------------------------------------------|
| <i>EHF 1</i> <sup>#</sup> | cgtaaacatcaacagattaaactggcaggattgctgaagcgtgtgtgtgtgcttcatagtgaa<br>gtagctctcaaatcctttttttttttggcatcatgcaaatacactcactggcatgaatcagcc<br>aatcaagcagaaggaagcaggtagaataaaaatcctcattggtcagcgtgaagtcataagttc<br>agcaggcctaaacactgacaggttcacagttctgtctctatcaaactcaaactctgtcccgtac<br>agacaccaaacttcagacaactttaactttctagtcg | 25         | 10319582-10319891<br>10319582-10319777: Upstream<br>10319778-10319891: 5'UTR |
| <i>EHF 2</i> <sup>#</sup> | cgtaaccaaatatttaattgtaataaacacaaattaatggaataatttcacgaaataacttagc<br>gtgagagcatcaaaacattgagtaactgtctagtttttttttttaggaaaaatacacaagcttct<br>aatatcctttgttcttgaggtgtgaacattatctgtttagcatagctcctgtcggttttacacat<br>tccataaatgatctcctagccatctcagaatcaataaaaa                                                             | 25         | 10324905-10325159<br>(Intron 1)                                              |
| <i>EPHA4</i>              | cgtaaatcgagtttgcttttcatttccaaaaggcagacgctgcctaattgcctgtcttccagttataag<br>tggtatattatgttctgagcaaatatcaggggctccggggttaaagcccggttcagtatctactgg<br>aagaacagagtagcggtttaagtgagagtaatgcattcaacattgggctgcactttgacctctgtgtc<br>g                                                                                           | 2          | 40624668-40624874<br>(Intron 11)                                             |
| <i>ITGB6</i>              | cgtgaggcaacaaaaagcaatgtggttttttctctgtgtgtgatagaataagaatatcaggt<br>gtgaatcactgtgtattcagctctccatataacatgttcaaacacagccttgatcacatcaccaga<br>ccgacctctctgacacaaatattcatgtttctgagctctccttcttcttctttatcactcgcgttc<br>atctcagattctgtggctgttctccagtttagagttgatgttaacca                                                      | 11         | 11011880-11012134<br>(Intron 7)                                              |

<sup>#</sup>Different CpG islands in *EHF*. The hypomethylated sites in these CpG islands are indicated in grey.

**Supplementary table 4. RT-qPCR primers**

| Gene Symbol     | Forward Primer (5'To 3') | Reverse Primer (5'To 3')   |
|-----------------|--------------------------|----------------------------|
| <i>AGR2</i>     | TGTCAGTGCTCTTGGTCATG     | CTTCCTCGTATGTCTGTGCC       |
| <i>ECE2</i>     | AGACGCTGGGAGAAAACATC     | AAGAGCTGGTCGTTTGTGTCAG     |
| <i>EHF</i>      | TTCCCGTGTTCAATTCTCCC     | CTTTTGACTTGTGACCGCTTG      |
| <i>EPCAM</i>    | TTTGATAAGAACTTGTGTCTGAAG | TGTAGTACGGTCGTCCTTATCTTTTT |
| <i>EPHA4</i>    | CACACCAACTACACCTTCCA     | GCGTGATGTCCTTACTCTGAA      |
| <i>EPS8L3</i>   | TGCCAGTCCACCGATTAAAG     | TGTGGAGGTGGAAAATCTGG       |
| <i>ITGB6</i>    | CGGTGGAGATAAAAGGCTGTC    | TGTTGGTTTCGGGTGTCTG        |
| <i>PDZK1IP1</i> | CCTCTTTCTCGTCTTCATCTCC   | ATTCGGTATGACTGCTTCTGG      |
| <i>SLC44A4</i>  | ACATACAAGCCAACCAGACC     | AAGCCCTCGGTGTTATAGTTG      |
| <i>SLC6A14</i>  | AGCTACTTTCCCTTACATCGTG   | TCTTTCCAAACCTCAGCCTC       |
| <i>SPINT2</i>   | ATAACTTTTACTCCAGGCGG     | TCATTTCAGTAAGAGCCTTGGG     |

**Supplementary table 5. Methylation PCR primers**

| Gene Symbol               | Forward Primer (5'To 3') | Reverse Primer (5'To 3') |
|---------------------------|--------------------------|--------------------------|
| <i>EHF</i> 1 <sup>#</sup> | GGTAAATAGGATGGTTTAG      | TCCCAATAAAAAATCAAAAAA    |
| <i>EHF</i> 2 <sup>#</sup> | TGTTTTATTTAAAGTTTACATT   | TAACAACATATATAAACAAC     |
| <i>EPHA4</i>              | GACCTTTTGTAGCATTGG       | TCTCCCACTAAACCTTCTG      |
| <i>ITGB6</i>              | GTTGTGATTAAAGATTAGAAGG   | AAAATCAAATACCAAAACCCCA   |

<sup>#</sup>Different CpG islands in *EHF*.

Full-length blots/gels of Supplementary Figure1 are presented

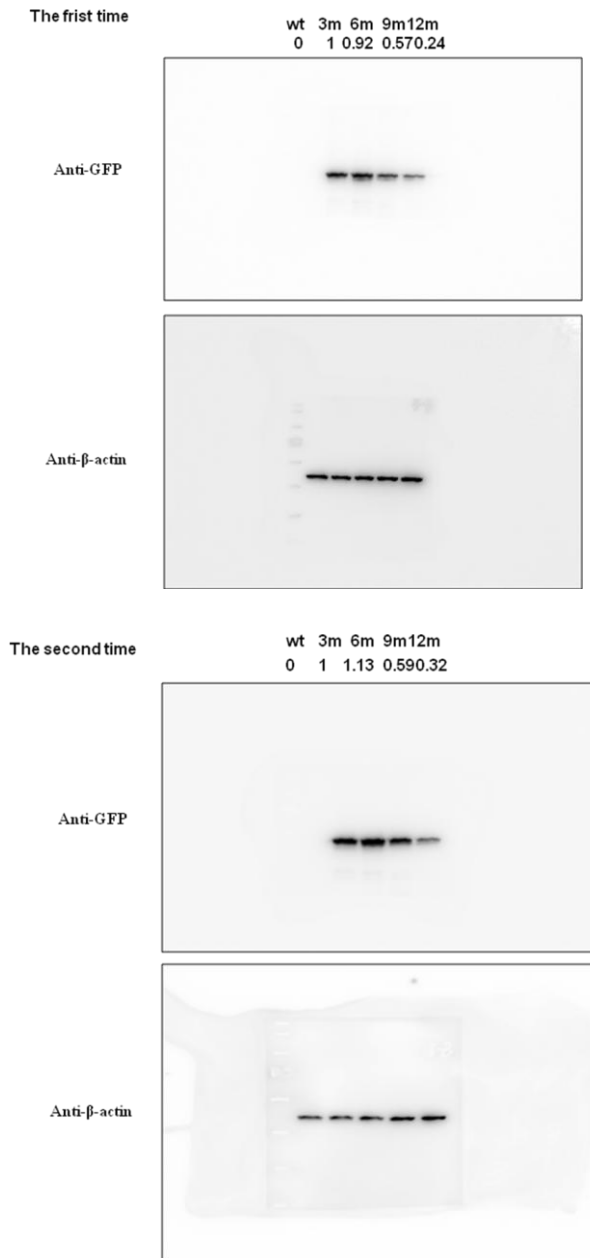



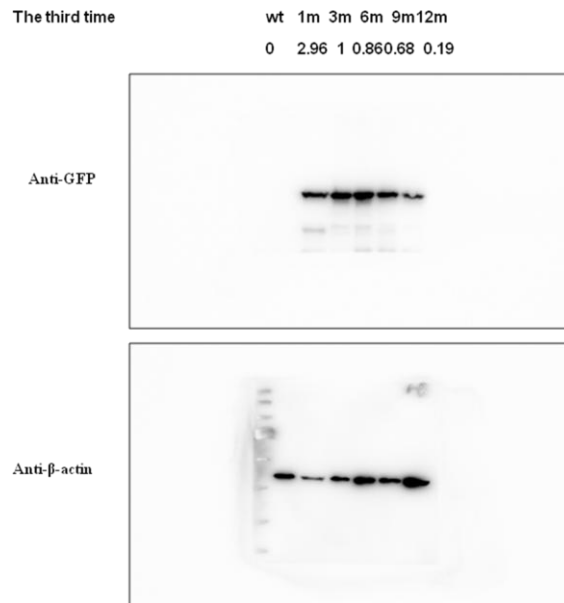

Full-length blots/gels of Supplementary Figure2 are presented

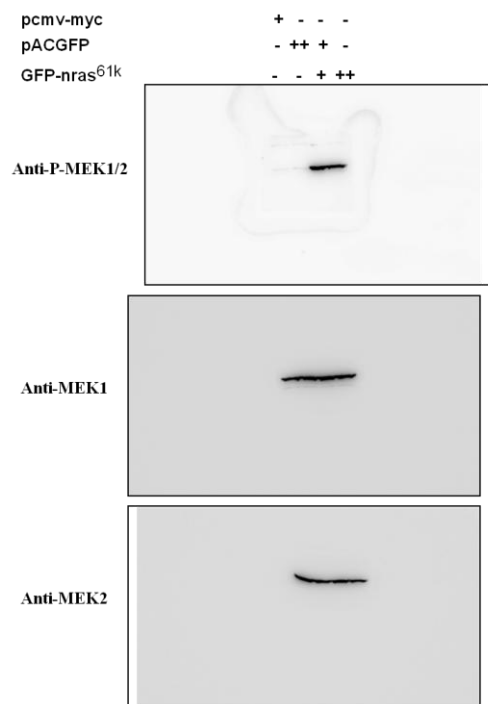

|                         |   |    |   |    |
|-------------------------|---|----|---|----|
| pcmv-myc                | + | -  | - | -  |
| pACGFP                  | - | ++ | + | -  |
| GFP-nras <sup>61k</sup> | - | -  | + | ++ |

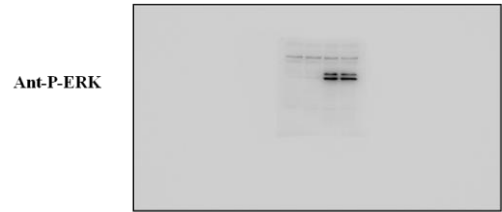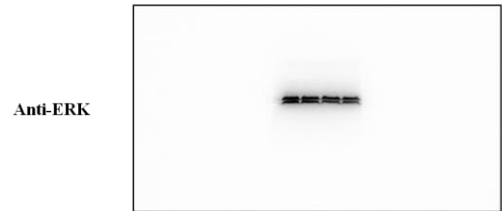

|                         |   |    |   |    |
|-------------------------|---|----|---|----|
| pcmv-myc                | + | -  | - | -  |
| pACGFP                  | - | ++ | + | -  |
| GFP-nras <sup>61k</sup> | - | -  | + | ++ |

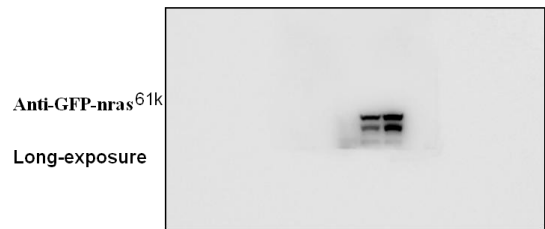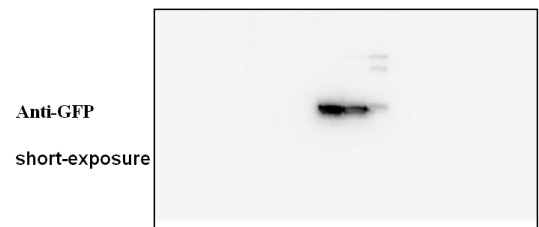

|                         |   |    |   |    |
|-------------------------|---|----|---|----|
| pcmv-myc                | + | -  | - | -  |
| pACGFP                  | - | ++ | + | -  |
| GFP-nras <sup>61k</sup> | - | -  | + | ++ |

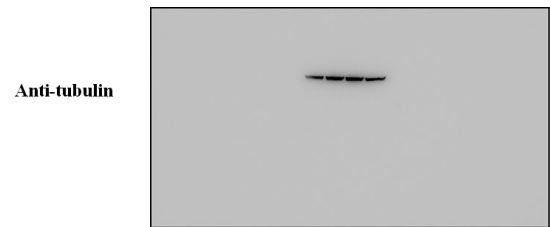

Supplement: 41598_2017_13815_MOESM3_ESM.pdf [file 41598_2017_13815_MOESM3_ESM.pdf]
